# Supplementary material for: Usher syndrome type 1-associated gene, pcdh15b, is required for photoreceptor structural integrity in zebrafish
Source: Oxford University Press journal article supplement (doi:10.1242/dmm.048965), 2021-10-20
Supplement: dmm048965supp.pdf [file dmm048965supp.pdf]

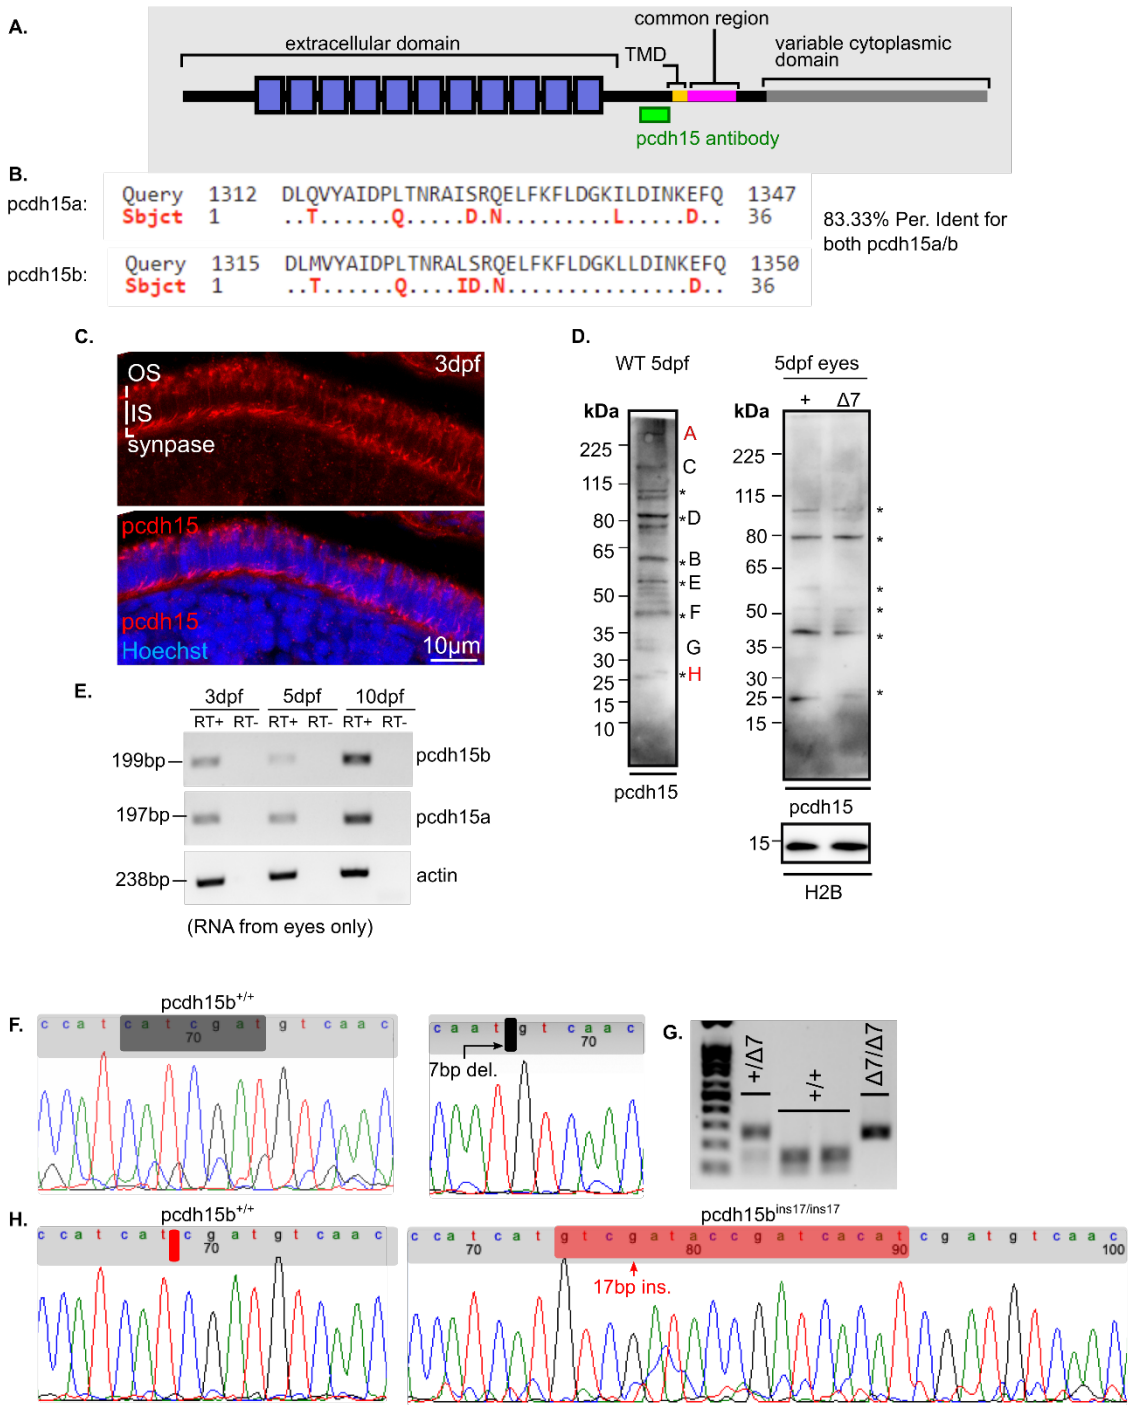

**Fig. S1. Generation of *pcdh15b* mutants by CRISPR.** (A) Schematic of *pcdh15* protein and the relevant domains (TMD= transmembrane domain) and the locations of the *pcdh15* antibody. (B) Alignment of the antigen recognized by the *pcdh15* antibody and *pcdh15a* (top) and *pcdh15b* (bottom). Query= *pcdh15a/b* protein sequence; Sbjct (red)= Mismatches from the antibody antigen sequence. (C) Representative image of *pcdh15* expression in the 3dpf retina at the ONL. OS= outer segment, IS= inner segment, ONL= outer nuclear layer, INL= inner nuclear layer. (D) Western blot analysis of the *pcdh15* antibody in isolated WT and mutant retinas. The \* bands are the well-defined bands in each blot. The lettering (A-H) correspond to bands previously seen and described in (Alagramam et al., 2011). (E) RT-PCR of *pcdh15a*, *pcdh15b* and control actin mRNA in 3dpf, 5dpf and 10dpf eyes. (F, H) Representative sequencing chromatograms of wildtype siblings (left panels) and mutants ( $\Delta 7$  (F), ins17 (H)) (right panels), with highlighted bands showing the affected regions (*grey* for 7bp deletion and *red* for 17bp insertion). (G) In addition to sequencing, the 7bp deletion (but not the 17bp insertion) can be identified by the loss of a *Clal* digest site resulting in an uncut large band, as shown in the representative gel.

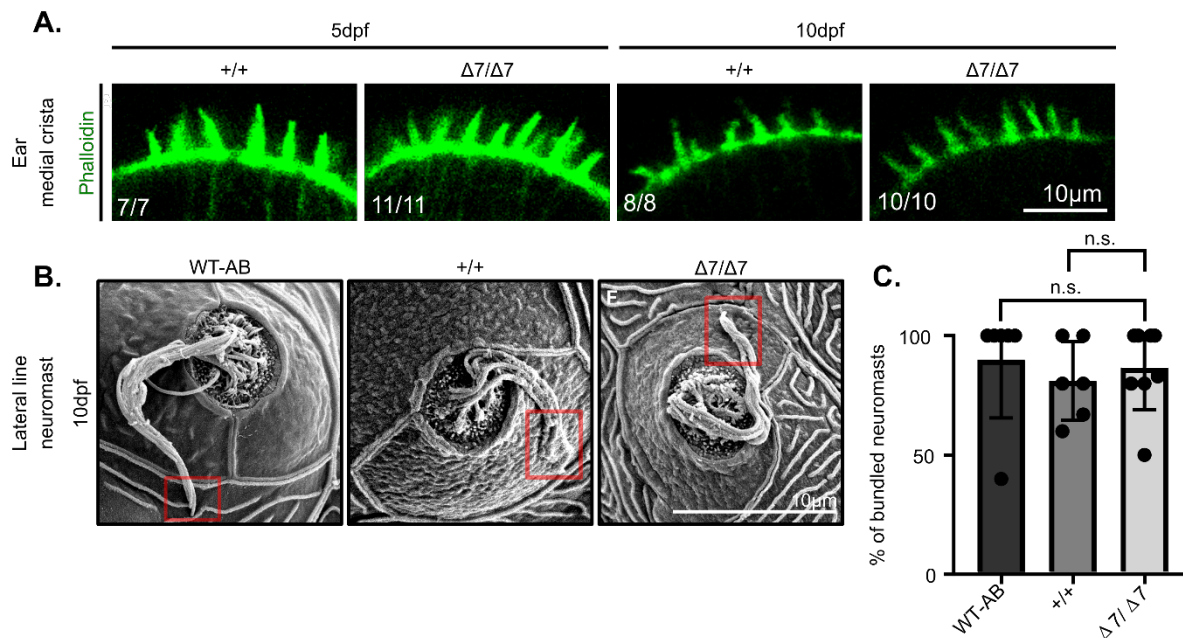

**Fig. S2. Hairs cells of the inner ear and lateral line are unaffected in *pcdh15b* mutants. (A)**

Representative images of stereocilia, found in hair cells of the medial crista of the inner ear, labelled by phalloidin (green) in wildtype siblings (+/+) and *pcdh15b* mutants ( $\Delta 7/\Delta 7$ ) at 5dpf (n=7, 11) and 10dpf (n= 8, 10). **(B)** Representative SEM images of neuromasts along the lateral line in unrelated wildtype-AB (WT-AB), wildtype siblings (+/+) and *pcdh15b* mutants ( $\Delta 7/\Delta 7$ ). Red boxes highlight the bundled tips found in each neuromast. **(C)** Quantification of bundled neuromast tips. One-way ANOVA n.s.=  $p > 0.05$ . Each individual graph point represents the percent of bundled tips from an average of at least 5 neuromasts examined per individual (WT-AB n=6, +/+ n=6,  $\Delta 7/\Delta 7$  n=8).

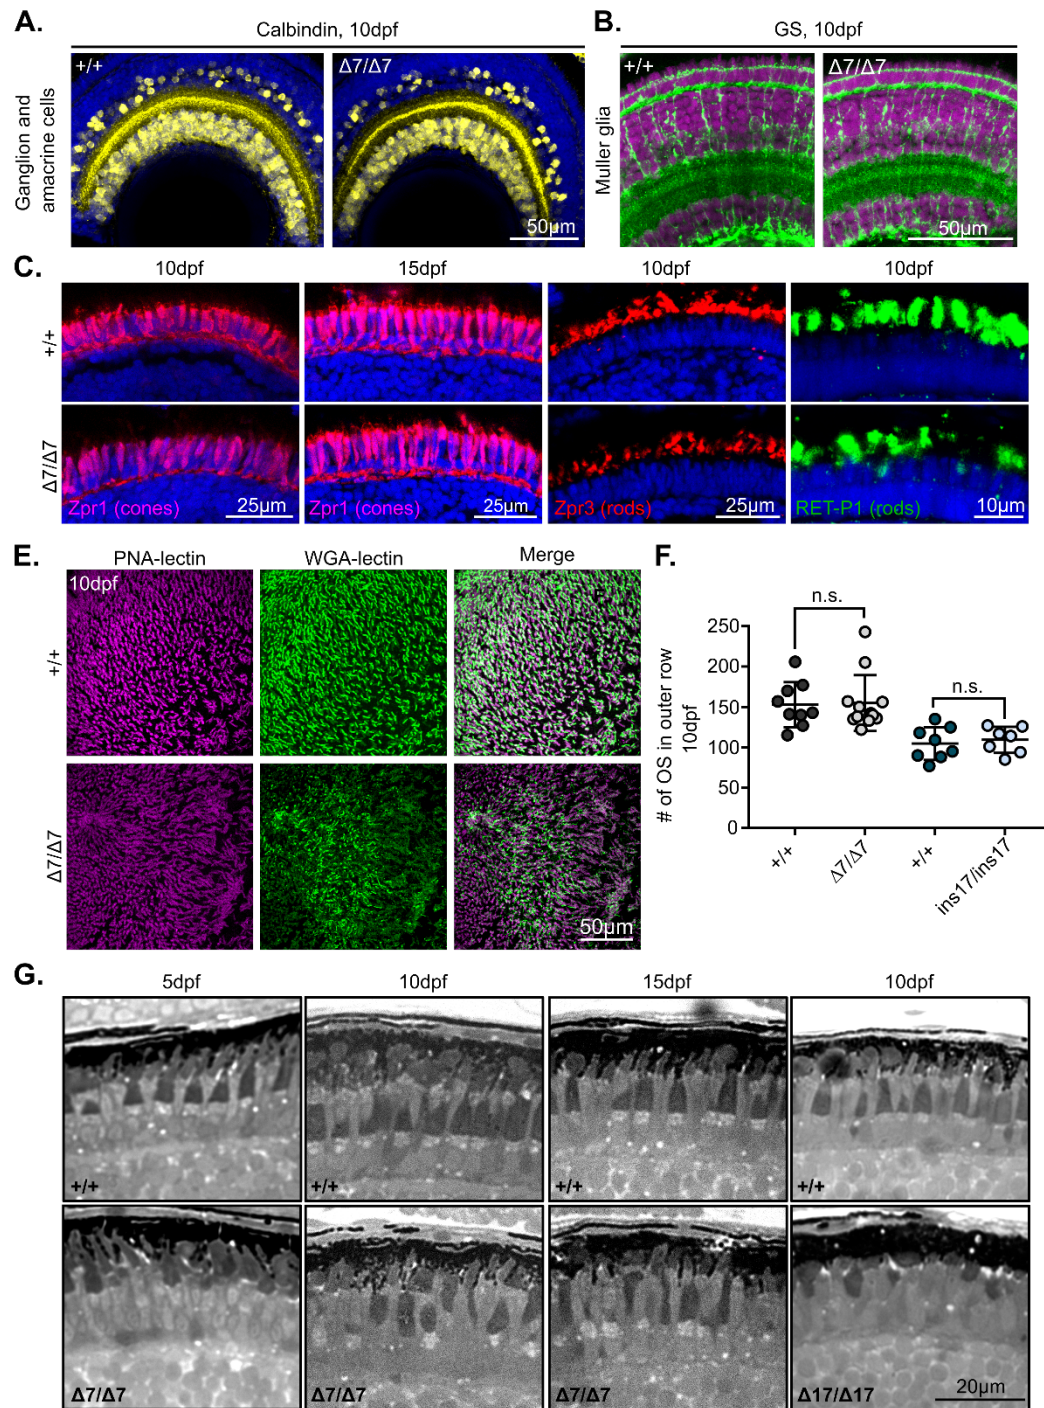

**Fig. S3. Abnormalities in the *pcdh15* mutant retina is restricted to the cone and rod photoreceptors. (A)** Representative images of calbindin (yellow), a ganglion and amacrine cell marker, and **(B)** glutamine synthetase (GS) (green), a Muller glia cell marker, at 10dpf in wildtype sibling and  $\Delta 7$



mutant retinas. Nuclei are counterstained with Hoechst (*Blue (A) /magenta (B)*). **(C)** Representative images from different cone and rod photoreceptor markers in wildtype siblings and  $\Delta 7$  mutants at 10dpf and 15dpf. Zpr1 labels red-green double cone cell bodies (*magenta*). Zpr3 labels a rod outer segment component (*red*). RET-P1, labels rhodopsin in outer segments (*green*). Nuclei are counterstained with Hoechst (*blue*). **(E)** Whole mount immunostaining of the retina, in wildtype siblings (n=17) and  $\Delta 7$  mutants (n=10) by WGA-lectin (*green*), and PNA-lectin (*magenta*) at 10dpf. **(F)** The number of OS found in the 'outer row' of the photoreceptor layer of wildtype siblings and *pcdh15b* mutants at 10dpf measured in TEM images across the entire ONL. **(G)** Representative semi-thin sections of the photoreceptor layer of *pcdh15b* mutants ( $\Delta 7$ , ins17) and their wildtype siblings from 5-15dpf.

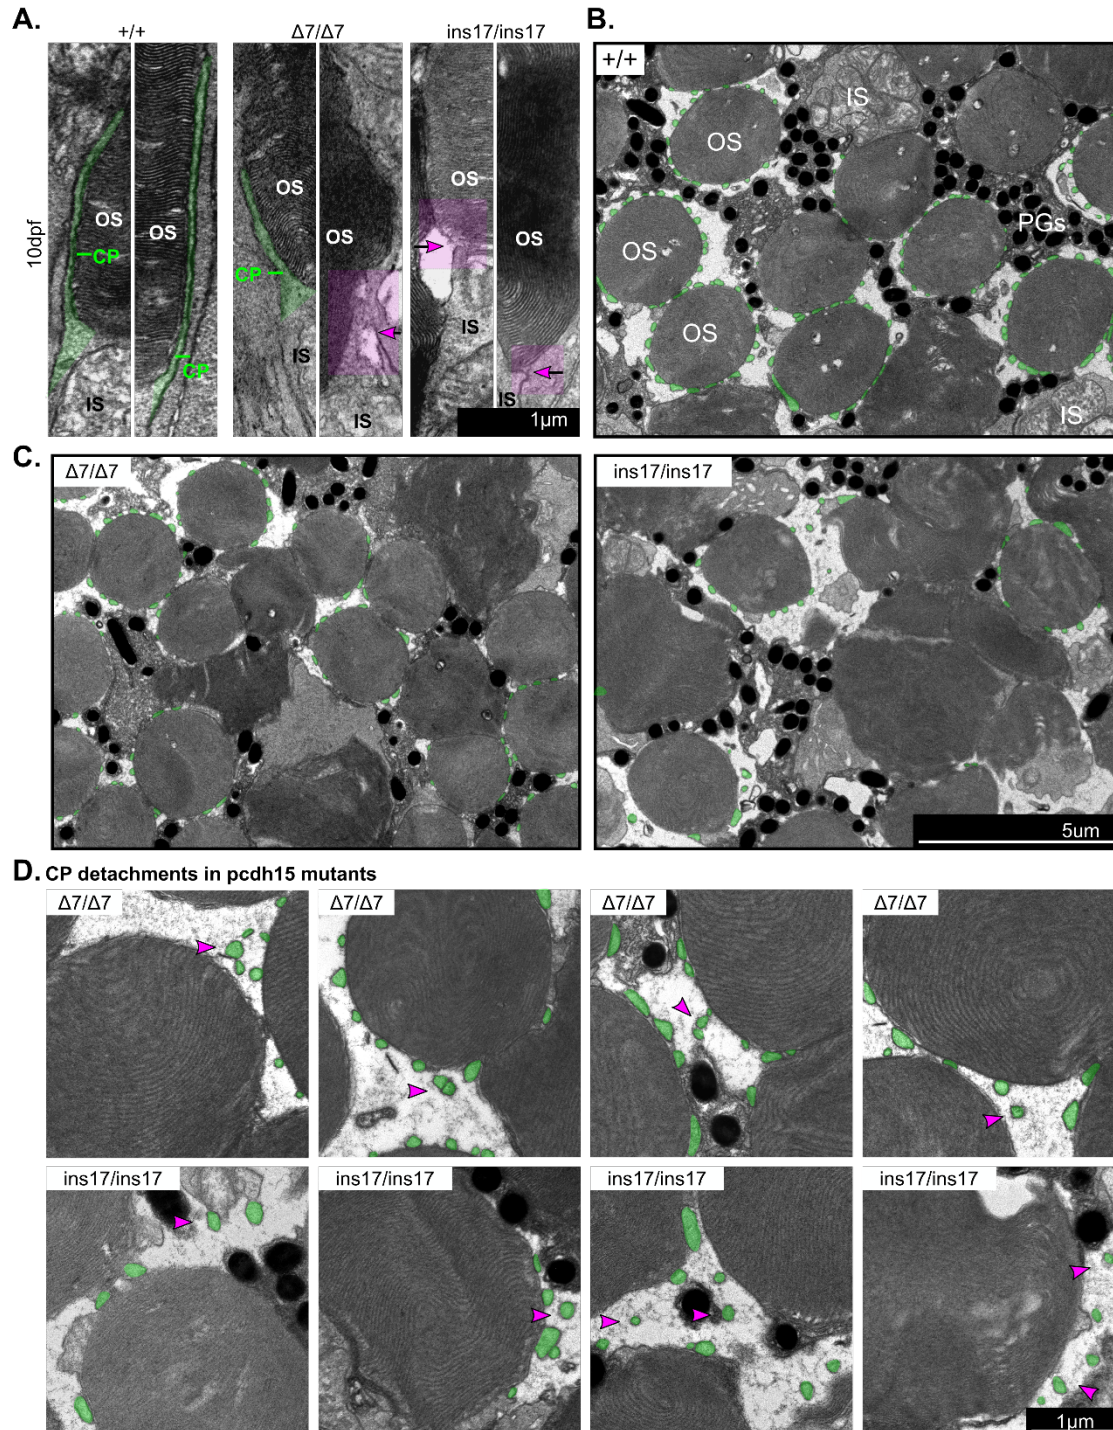

**Fig. S4. CPs become detached and are eventually lost/reduced in *pcdh15b* mutant photoreceptors.** (A) Representative TEM images of CPs found on the side of OS in wildtype sibling and *pcdh15b* mutant photoreceptors. CPs are highlighted in green. Regions in *pcdh15b*

mutants that have lost CPs are highlighted in magenta and shown with a magenta arrow. **(B-C)** Overview representative images of horizontal TEM sections through the photoreceptor layer in wildtype siblings (B) and mutants (C). CPs surrounding photoreceptor OS are coloured green. Abnormal OS shape in mutants can also be seen in these sections. **(D)** Multiple examples from horizontal TEM sections showing CP detachment (magenta arrowhead) in the different *pcdh15b* mutants ( $\Delta 7$  and *ins17*). All visible CPs are coloured green. CPs= calyceal processes, OS= outer segment, IS= inner segment, PGs= pigment granules.

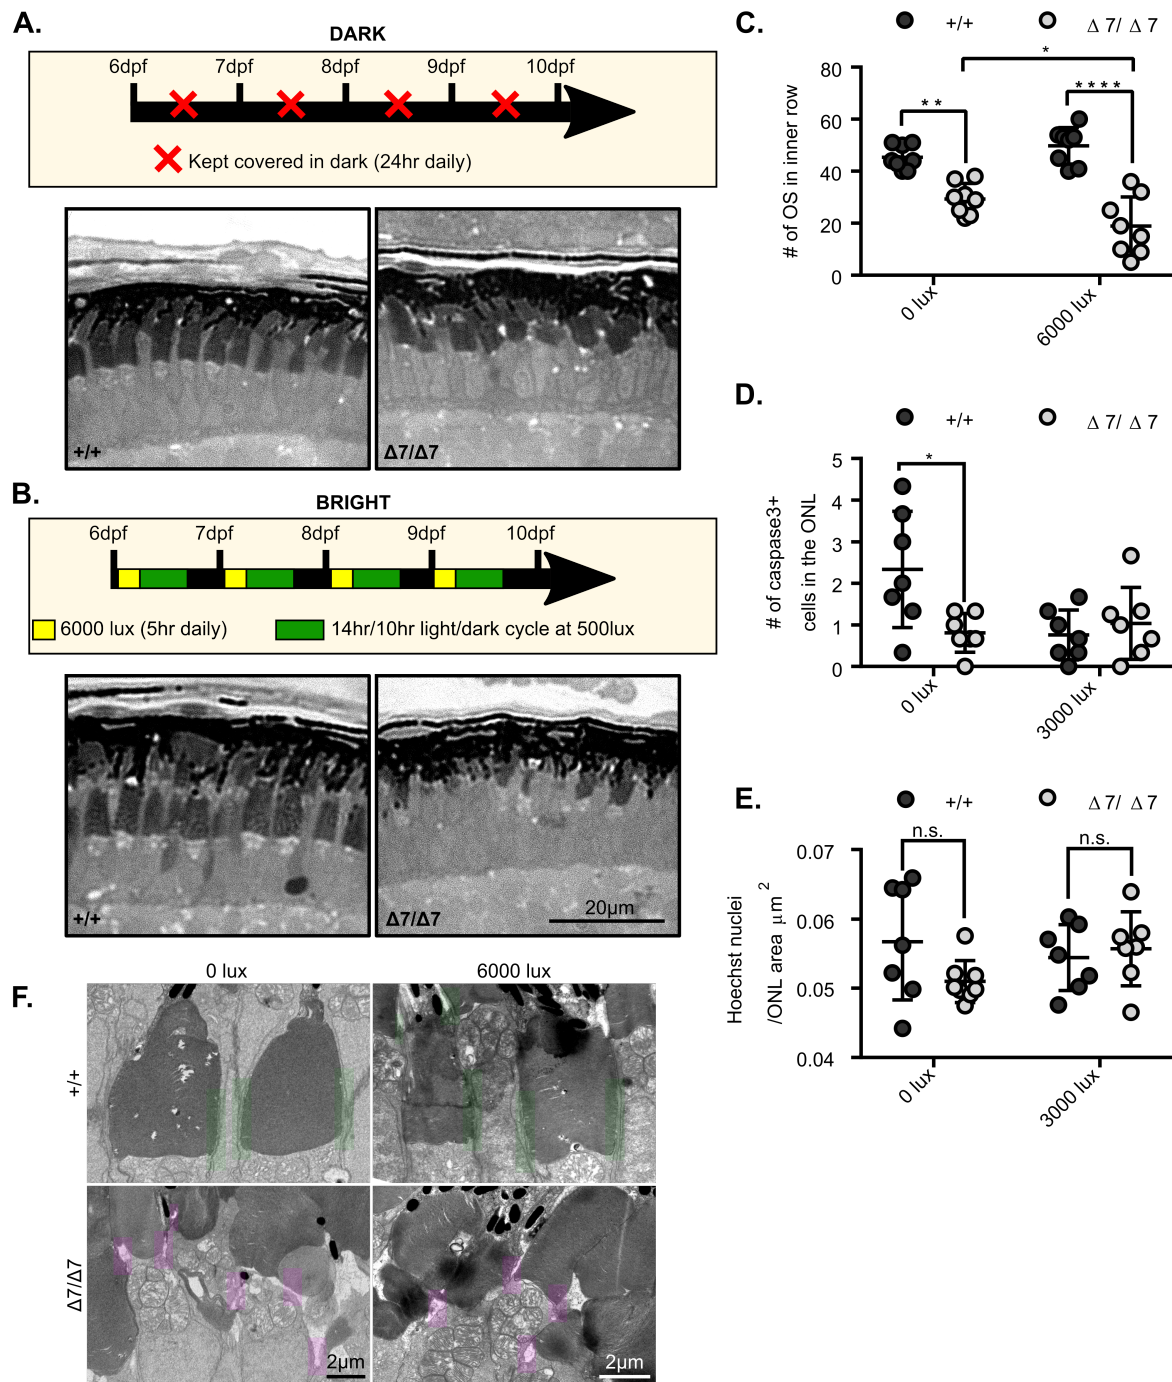

**Fig. S5. Light exposure influences the severity of abnormalities in the photoreceptors of *pcdh15b* mutants. (A-B)** Wildtype siblings and  $\Delta 7$  mutants were grown under dark conditions (0 lux) (A) or bright light conditions (6000 lux) (B) from 6-10dpf. Representative semi-thin retinal sections (1 $\mu\text{m}$  thick) of



wildtype sibling (n=8 eyes (0 lux), 8 eyes (6000 lux)) and  $\Delta 7$  mutants (n=8 eyes (0 lux), 8 eyes (6000 lux)) under each condition at 10dpf. **(C)** Quantification of the number of OS in the inner row across a semi-thin section in the different light conditions. **(D-E)** Quantification of the number of caspase-3+ cells in the ONL/section (D) and photoreceptor density (Hoechst nuclei/ONL area) between wildtype siblings (n=7 eyes (0 lux), 7 eyes (3000 lux)) and  $\Delta 7$  mutants (n=7 eyes (0 lux), 7 eyes (3000 lux)) (E) under the different light conditions. **(F)** Example images of CPs visualized by TEM in dark and bright conditions in wildtype siblings and mutants. Green boxes highlight attached CPs, magenta boxes highlight detached CPs. Statistical tests in (C, D, E) were performed using two-way ANOVA. n.s., non-significant, \* $P \leq 0.05$ , \*\* $P \leq 0.01$ , \*\*\*\* $P \leq 0.0001$ .

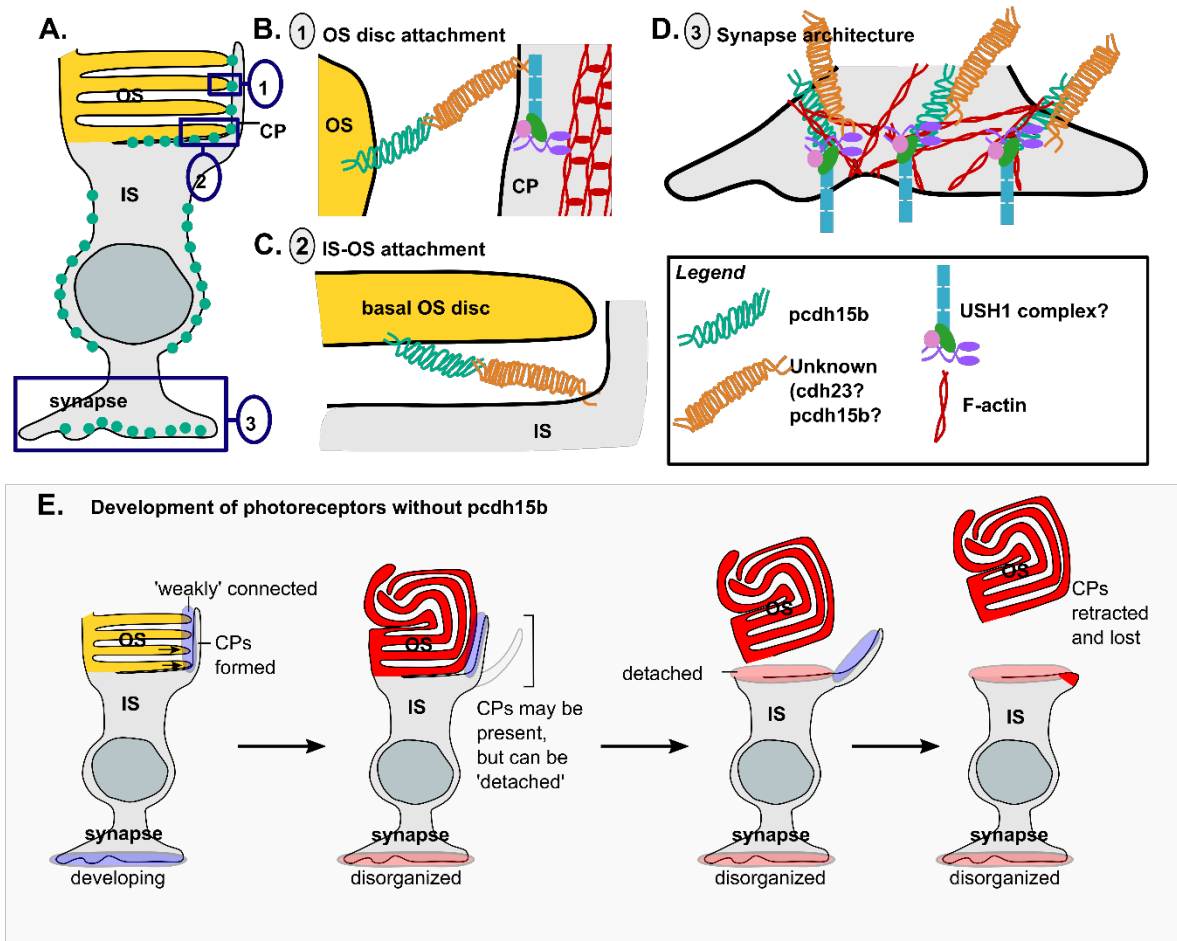

**Fig. S6. Model of pcdh15b function in the zebrafish retina.** These data suggest that zebrafish pcdh15b functions at 3 main subcellular compartments in the photoreceptor: the CPs, the IS-OS junction and the synapse. **(A)** Schematic of the photoreceptor and location of pcdh15 expression based on our pcdh15 expression data. OS= outer segment, IS= inner segment, CP= calyceal processes. Green dots are locations of pcdh15 expression. Blue boxes are the regions examined more closely in (B-D). **(B)** Close up OS disc schematic of the attachment between OS discs and the CP mediated by pcdh15, and possible other proteins not yet clarified in zebrafish. **(C)** Close up of the IS-OS attachment between the basal OS disc and the IS plasma membrane by pcdh15 **(D)** Close up schematic of how pcdh15 (and other USH1 proteins) organized the actin

cytoskeleton and synapse in photoreceptors. (E) Schematic of the photoreceptor developing in the absence of *pcdh15b*. Images left to right: (First) As the photoreceptor develops the discs of the OS start to move towards a formed CP protrusion, however it does not form a strong attachment. (2) Without a strong attachment, the OS discs instead continue to grow in abnormal directions. By the time the synapses mature, they are disorganized. (3) The OS will eventually detach as *pcdh15* is not there to secure the attachment to the IS plasma membrane. CPs will start to fall away. (4) The detached OS will float further away from the rest of the photoreceptor and eventually the CP will be completely lost and retracted. Retraction may occur earlier in the previous stages. Red colouring in the image highlights regions that have become defective in the photoreceptor.
